# Supplementary material for: A new strategy in molecular typing: the accuracy of an NGS panel for the molecular classification of endometrial cancers
Source: PubMed Central journal article supplement — Ann Transl Med. 2022 Aug;10(16):870. doi: 10.21037/atm-22-3446 (PMC9469165; doi:10.21037/atm-22-3446), 2022-08
Supplement: atm-10-16-870-dss.pdf [file atm-10-16-870-dss.pdf]

## Data Sharing Statement

|                     |                                                                                                                                                     |                                                                                                                                                                                                          |
|---------------------|-----------------------------------------------------------------------------------------------------------------------------------------------------|----------------------------------------------------------------------------------------------------------------------------------------------------------------------------------------------------------|
| <b>Article Info</b> | <a href="https://dx.doi.org/10.21037/atm-22-3446">https://dx.doi.org/10.21037/atm-22-3446</a>                                                       |                                                                                                                                                                                                          |
| <b>Item</b>         | <b>Question</b>                                                                                                                                     | <b>Authors' Response<br/>(place "-" if not applicable)</b>                                                                                                                                               |
| 1                   | Would you like to share data collected for your study to others?                                                                                    | Yes                                                                                                                                                                                                      |
| 2                   | If not, would you like to share the reason for your decision?                                                                                       | -                                                                                                                                                                                                        |
| 3                   | What data in particular will be shared?                                                                                                             | The results data of sequence and IHC about participating patients will be shared, and the original sequencing data related to this study is available from corresponding author upon reasonable request. |
| 4                   | Any other documents will be shared? Such as study protocol, statistical analysis plan, informed consent form, clinical study report, analytic code. | Statistical analysis plan, informed consent form, and will also be shared if requested.                                                                                                                  |
| 5                   | When will data availability begin?                                                                                                                  | From the publication date.                                                                                                                                                                               |
| 6                   | When will data availability end?                                                                                                                    | One year within the publication date, since the technique may be updated or more cases will be collected over time.                                                                                      |
| 7                   | To whom will you share the data?                                                                                                                    | Medical oncologists and endometrial cancer doctor.                                                                                                                                                       |
| 8                   | For what type of analysis or purpose?                                                                                                               | Molecular typing and prognosis of endometrial cancer.                                                                                                                                                    |
| 9                   | How or where can the data/documents be obtained?                                                                                                    | Emails could be sent to the address of corresponding author to obtain the shared data.                                                                                                                   |
| 10                  | Any other restrictions?                                                                                                                             | We may balance the potential benefits and risks for each request and then provide the data that could be shared.                                                                                         |
